# Supplementary material for: Would you be healthier if you had more social capital? Focusing on university students’ social media use in Japan
Source: PubMed Central journal article supplement — BMC Psychol. 2024 Dec 24;12:776. doi: 10.1186/s40359-024-02278-4 (PMC11667995; doi:10.1186/s40359-024-02278-4), 2024-12-24
Supplement: 40359_2024_2278_MOESM1_ESM.pdf [file 40359_2024_2278_MOESM1_ESM.pdf]

**Appendix: Correlation Matrix**

|                       | Loneliness | Online Social Capital | Personality Traits | Physical Health | SWB   | Social Capital | Social Media Use |
|-----------------------|------------|-----------------------|--------------------|-----------------|-------|----------------|------------------|
| Loneliness            |            |                       |                    |                 |       |                |                  |
| Online Social Capital | 0.063      |                       |                    |                 |       |                |                  |
| Personality Traits    | 0.629      | 0.111                 |                    |                 |       |                |                  |
| Physical Health       | 0.253      | 0.011                 | 0.215              |                 |       |                |                  |
| SWB                   | 0.618      | 0.027                 | 0.529              | 0.149           |       |                |                  |
| Social Capital        | 0.496      | 0.235                 | 0.346              | 0.178           | 0.326 |                |                  |
| Social Media Use      | 0.141      | 0.551                 | 0.317              | 0.127           | 0.191 | 0.203          |                  |
